# Supplementary material for: Comparative Evaluation of the Cytotoxicity of Doxorubicin in BT-20 Triple-Negative Breast Carcinoma Monolayer and Spheroid Cultures
Source: MDPI journal article supplement (doi:10.3390/biomedicines11051484), 2023-05-19
Supplement: s1 [file s1]

# Supplementary data

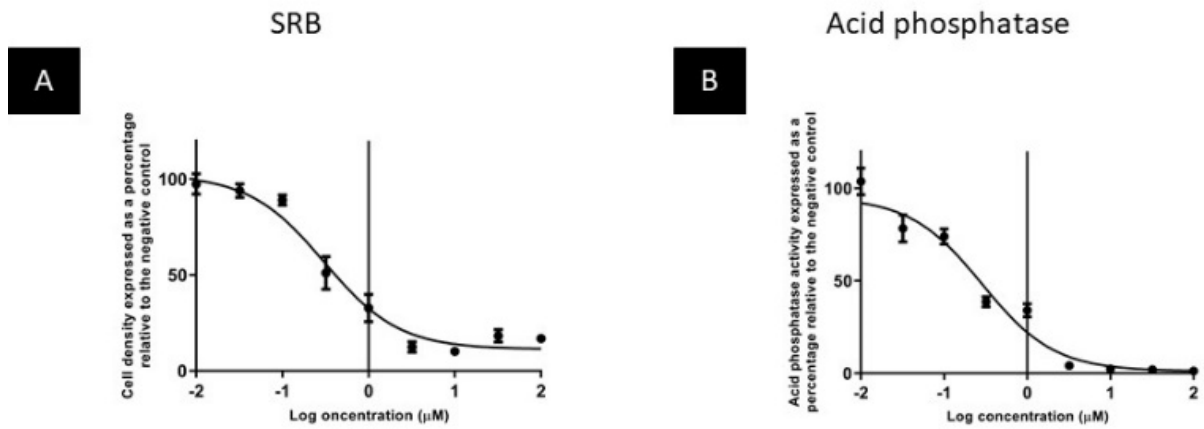

**Figure S1:** Dose–response curves showing the alteration of cell density,  $N = 5$  biological repeats (A) and APH,  $N = 4$  biological repeats (B) of monolayers treated with half-log dilutions of 32  $\mu\text{M}$  doxorubicin for 72 h. The  $\text{IC}_{50}$  was calculated using a non-linear regression curve fit ( $\log[\text{inhibitor}]$  vs response) with a robust fit.
